# Supplementary material for: Applying the Minimal Detectable Change of a Static and Dynamic Balance Test Using a Portable Stabilometric Platform to Individually Assess Patients with Balance Disorders
Source: Healthcare (Basel). 2020 Oct 14;8(4):402. doi: 10.3390/healthcare8040402 (PMC7712175; doi:10.3390/healthcare8040402)
Supplement: Supplementary file 1 [file healthcare-08-00402-s001.xlsx]

## Sheet: Clinical Information
	Patient Code	Age	Gender	Vertigo Aetiology	Anamnesis and Examination	Treatment	Changes in symptomatology	Functional Tests	Balance Test Results	Physician Assessment	Agreement Bal. Test - Phys. Asses.
	01	47	Male	Vestibular	BPPV with associated signs of bilateral hearing loss (detected by audiometry) and nystagmus.	VRE	- Falls (last 3 months): 0 to 0. - Instability due to positional change: Improvement. - Vertigo episodes (last 3 months): Some episodes (duration: minutes) to 0.	Unter: + to - UP: imp. UST (right/left): imp./imp.	Decrease in static variables and increase in dynamics: improvement	Positive evolution of the patient.	Agre.
	02	49	Female	Vestibular	Ménière syndrome.	VRE	- Falls (last 3 months): 1 to 0. - Instability due to positional change: No changes. - Vertigo episodes (last 3 months): Some episodes (duration: hours) to 0.	Unter: + to - UP: = UST (right/left): imp./imp.	Decrease in static variables and increase in dynamics: improvement	Positive evolution of the patient.	Agre.
	03	41	Male	Vestibular	BPPV with associated signs of bilateral hearing loss (detected by audiometry).	VRE	- Falls (last 3 months): 1 to 0. - Instability due to positional change: No changes. - Vertigo episodes (last 3 months): 0 to 0.	Unter: - to - UP: = UST (right/left): imp./imp.	Decrease in static variables and increase in dynamics: improvement	Positive evolution of the patient.	Agre.
	04	39	Female	Vestibular	Otoesclerosis. Bilateral hearing loss.	VRE	- Falls (last 3 months): 0 to 0. - Instability due to positional change: No changes. - Vertigo episodes (last 3 months): 0 to 0.	Unter: + to + UP: = UST (right/left): =/=	No changes in the variables.	No evolution detected.	Agre.
	05	43	Male	Vestibular	Ménière syndrome. Unilateral tinnitus and pathological nystagmus.	VRE	- Falls (last 3 months): 0 to 2. - Instability due to positional change: No changes. - Vertigo episodes (last 3 months): Some episodes (duration: minutes) to some episodes (duration: minutes).	Unter: + to + UP: = UST (right/left): wor./wor.	Increase in static variables and decrease in dynamics: worsening.	Negative evolution of the patient.	Agre.
	06	54	Male	Vestibular	Ménière syndrome. Unilateral tinnitus.	VRE	- Falls (last 3 months): 2 to 8. - Instability due to positional change: No changes. - Vertigo episodes (last 3 months): Continuous to continuous.	Unter: + to + UP: wor. UST (right/left): wor./wor.	Increase in static variables and decrease in dynamics: worsening.	Negative evolution of the patient.	Agre. The patient could only perform one test (RSEO).
	07	60	Female	Vestibular	Vestibular hypofunction. Pathological nystagmus.	VRE	- Falls (last 3 months): 3 to 0. - Instability due to positional change: No changes. - Vertigo episodes (last 3 months): Some episodes (duration: days) to some episodes (duration: days).	Unter: + to + UP: = UST (right/left): imp./imp.	Increase in static variables and decrease in dynamics: worsening.	No evolution detected.	Disa.
	08	55	Male	Vestibular	BPPV with associated signs of bilateral hearing loss (detected by audiometry).	VRE	- Falls (last 3 months): 3 to 3. - Instability due to positional change: No changes. - Vertigo episodes (last 3 months): Some episodes (duration: hours) to some episodes (duration: hours).	Unter: + to + UP: = UST (right/left): imp./imp.	Increase in static variables and decrease in dynamics: worsening.	No evolution detected.	Disa. The patient could not perform the SSEC test.
		BPPV	Benign Paroxysmal Peripheral Vertigo
		VRE	Vestibular Rehabilitation Exercises
		Unter	Test Unterberger
		UP	Test Up & Go
		UST	Test Unipodal Standing Time
		Imp.	Improvement
		Wor.	Worsening
		Agre.	Agreement
		Disa.	Disagreement
		RSEO	Rigid Surface Eyes Open
		RSEC	Rigid Surface Eyes Closed
		SSEO	Soft Surface Eyes Open
		SSEC	Soft Surface Eyes Closed
		LDE	Limits Of Stability

## Sheet: Patient 01
		Patient Code	Age	Gender	Vertigo Aetiology	Anamnesis and Examination	Treatment	Changes in symptomatology	Functional Tests	Balance Test Results	Physician Assessment	Agreement Bal. Test - Phys. Asses.
		01	47	Male	Vestibular	BPPV with associated signs of bilateral hearing loss (detected by audiometry) and nystagmus.	VRE	- Falls (last 3 months): 1 to 0. - Instability due to positional change: No changes. - Vertigo episodes (last 3 months): Some episodes (duration: hours) to 0.	Unter: + to - UP: imp. UST (right/left): imp./imp.	Decrease in static variables and increase in dynamics: improvement	Positive evolution of the patient.	Agre.
	Test	Variables	Value Pre	Value Post	Difference	MDC	% Negative differences	% Trivial differences	% Positive differences
	RSEO	COP mean speed [mm/s]	13.2504	11.2425	-2.00798	2.27	0.411075	0.588522	0.000403141	41/59/0					RIGID SURFACE EYES OPEN														SOFT SURFACE EYES OPEN
		RMS [mm]	6.50029	4.95344	-1.54685	2.59	0.217527	0.780639	0.00183479	22/78/0
		Area[cm2]	3.38553	2.13631	-1.24922	1.38	0.426913	0.57272	0.000367427	43/57/0
		AP disp. [mm]	20.0107	17.0283	-2.98238	11.6	0.0776367	0.91269	0.00967332	8/91/1	COP mean speed [mm/s]													COP mean speed [mm/s]
		ML disp. [mm]	22.3924	17.6904	-4.70195	7.05	0.259144	0.739566	0.00129032	26/74/0
	RSEC	COP mean speed [mm/s]	20.3369	16.9111	-3.4258	3.29	0.531963	0.467867	0.000169847	53/47/0
		RMS [mm]	7.62545	7.50953	-0.115924	1.88	0.0376282	0.939601	0.0227703	4/94/2	RMS [mm]													RMS [mm]
		Area[cm2]	5.05794	3.27206	-1.78588	2.04	0.404468	0.595107	0.000425028	40/60/0
		AP disp. [mm]	26.8774	31.5903	4.71284	9.66	0.00316613	0.835405	0.161429	0/84/16
		ML disp. [mm]	30.4335	19.9952	-10.4383	8.71	0.650093	0.349838	6.937e-05	65/35/0	Area[cm2]													Area[cm2]
	SSEO	COP mean speed [mm/s]	18.5458	17.9526	-0.593173	2.49	0.0724545	0.917121	0.0104249	7/92/1
		RMS [mm]	7.30797	6.83239	-0.475579	1.98	0.072874	0.91682	0.0103061	7/92/1
		Area[cm2]	4.86193	3.73534	-1.12659	1.47	0.325377	0.673856	0.000767072	33/67/0
		AP disp. [mm]	23.3211	23.3017	-0.0194196	8.75	0.0294961	0.941538	0.0289664	3/94/3	AP disp. [mm]													AP disp. [mm]
		ML disp. [mm]	44.2739	28.3626	-15.9113	7.73	0.977088	0.0229117	4.86488e-07	98/2/0
	SSEC	COP mean speed [mm/s]	62.5905	49.3813	-13.2092	8.46	0.860533	0.139458	8.6251e-06	86/14/0
		RMS [mm]	19.2356	15.0164	-4.2192	3.01	0.781414	0.218564	2.21186e-05	78/22/0	ML disp. [mm]													ML disp. [mm]
		Area[cm2]	40.9688	25.3887	-15.5801	7.15	0.986392	0.0136079	2.44534e-07	99/1/0
		AP disp. [mm]	102.437	62.2254	-40.212	20.4	0.967152	0.0328473	8.09476e-07	97/3/0
		ML disp. [mm]	66.4846	72.476	5.99144	21.41	0.00861896	0.907613	0.0837684	1/91/8
	LDE	COP mean speed [mm/s]	19.0232	21.2197	2.19648	2.26	0.00024272	0.521588	0.47817	0/52/48					RIGID SURFACE EYES CLOSED														SOFT SURFACE EYES CLOSED
		RMS [mm]	5.47301	6.16923	0.696227	0.2	1.46834e-10	1.18679e-05	0.999988	0/0/100
		Area[cm2]	169.966	233.976	64.0101	21.65	3.11261e-09	0.000268572	0.999731	0/0/100
		AP disp. [mm]	154.888	176.835	21.9466	14.39	1.06963e-05	0.155392	0.844597	0/16/84	COP mean speed [mm/s]													COP mean speed [mm/s]
		ML disp. [mm]	150.331	179.497	29.1659	14.81	8.20889e-07	0.0331159	0.966883	0/3/97
		Lim.COP.Forward [mm]	86.77	108.177	21.4067	15.04	1.92153e-05	0.206288	0.793693	0/21/79
		Lim.COP.Forward-rightward [mm]	92.5048	108.338	15.8328	10.21	9.23036e-06	0.144091	0.8559	0/14/86	RMS [mm]													RMS [mm]
		Lim.COP.Rightward [mm]	0	92.8315	92.8315	14	1.47023e-16	6.48592e-13	1	0/0/100
		Lim.COP.Backward-rightward [mm]	60.4235	72.5291	12.1056	11.41	0.000150843	0.452669	0.547181	0/45/55
		Lim.COP.Backward [mm]	32.6708	69.0357	36.365	15.6	1.0292e-07	0.00677931	0.993221	0/1/99	Area[cm2]													Area[cm2]
		Lim.COP.Backward-leftward [mm]	59.9644	82.0868	22.1225	14.37	9.87932e-06	0.149029	0.850961	0/15/85
		Lim.COP.Leftward [mm]	72.674	86.9906	14.3167	13.06	0.00012306	0.425637	0.57424	0/43/57
		Lim.COP.Forward-leftward [mm]	106.597	104.734	-1.86297	12.54	0.0523357	0.932074	0.0155907	5/93/2	AP disp. [mm]													AP disp. [mm]
		Success.Forward [%]	50.653	68.8142	18.1612	25.77	0.00104141	0.715596	0.283363	0/72/28
		Success.Forward-rightward [%]	69.0154	73.6232	4.60774	13.19	0.00619566	0.888332	0.105472	1/89/11
		Success.Rightward [%]	43.9313	88.172	44.2408	18.13	5.54102e-08	0.00400977	0.99599	0/0/100
		Success.Backward-rightward [%]	45.3488	81.5116	36.1628	22.95	8.00668e-06	0.133652	0.86634	0/13/87	ML disp. [mm]													ML disp. [mm]
		Success.Backward [%]	53.949	91.8689	37.92	18.51	5.1744e-07	0.0239023	0.976097	0/2/98
		Success.Backward-leftward [%]	43.554	70.151	26.597	27.69	0.000262194	0.530341	0.469397	0/53/47
		Success.Leftward [%]	55.914	75.0538	19.1398	14.37	3.24862e-05	0.259874	0.740094	0/26/74
		Success.Forward-leftward [%]	58.4778	79.2471	20.7693	16.51	4.95843e-05	0.308197	0.691754	0/31/69											LIMITS OF STABILITY
														COP mean speed [mm/s]
		RSEO: Rigid Surface Eyes Open												RMS [mm]
		RSEC: Rigid Surface Eyes Closed												Area[cm2]
		SSEO: Soft Surface Eyes Open												AP disp. [mm]
		SSEC: Soft Surface Eyes Closed												ML disp. [mm]
														Lim.COP.Forward [mm]
		LDE: Limits Of Stability												Lim.COP.Forward-rightward [mm]
														Lim.COP.Rightward [mm]
														Lim.COP.Backward-rightward [mm]
														Lim.COP.Backward [mm]
														Lim.COP.Backward-leftward [mm]
														Lim.COP.Leftward [mm]
														Lim.COP.Forward-leftward [mm]
														Success.Forward [%]
														Success.Forward-rightward [%]
														Success.Rightward [%]
														Success.Backward-rightward [%]
														Success.Backward [%]
														Success.Backward-leftward [%]
														Success.Leftward [%]
														Success.Forward-leftward [%]

## Sheet: Patient 02
		Patient Code	Age	Gender	Vertigo Aetiology	Anamnesis and Examination	Treatment	Changes in symptomatology	Functional Tests	Balance Test Results	Physician Assessment	Agreement Bal. Test - Phys. Asses.
		02	49	Female	Vestibular	Ménière syndrome.	VRE	- Falls (last 3 months): 1 to 0. - Instability due to positional change: No changes. - Vertigo episodes (last 3 months): Some episodes (duration: hours) to 0.	Unter: + to - UP: = UST (right/left): imp./imp.	Decrease in static variables and increase in dynamics: improvement	Positive evolution of the patient.	Agre.
	Test	Variables	Value Pre	Value Post	Difference	MDC	% Negative differences	% Trivial differences	% Positive differences
	RSEO	COP mean speed [mm/s]	8.37488	6.89869	-1.47619	2.27	0.248634	0.749973	0.00139277	25/75/0					RIGID SURFACE EYES OPEN														SOFT SURFACE EYES OPEN
		RMS [mm]	6.69237	3.68789	-3.00448	2.59	0.622257	0.377654	8.89e-05	62/38/0
		Area[cm2]	2.49468	1.07838	-1.4163	1.38	0.520399	0.479411	0.000189837	52/48/0
		AP disp. [mm]	24.5695	12.1249	-12.4446	11.6	0.556269	0.443584	0.000147458	56/44/0	COP mean speed [mm/s]													COP mean speed [mm/s]
		ML disp. [mm]	17.0766	12.412	-4.66462	7.05	0.255852	0.742821	0.00132617	26/74/0
	RSEC	COP mean speed [mm/s]	9.64109	9.98424	0.343157	3.29	0.0189787	0.936637	0.0443843	2/94/4
		RMS [mm]	6.2097	6.33832	0.128621	1.88	0.0221315	0.939228	0.03864	2/94/4	RMS [mm]													RMS [mm]
		Area[cm2]	2.80056	2.33124	-0.469314	2.04	0.0707175	0.91836	0.0109226	7/92/1
		AP disp. [mm]	27.8108	30.5425	2.73168	9.66	0.00849899	0.9069	0.0846008	1/91/8
		ML disp. [mm]	18.4466	15.6041	-2.84248	8.71	0.0978793	0.8952	0.00692105	10/90/1	Area[cm2]													Area[cm2]
	SSEO	COP mean speed [mm/s]	20.8054	14.6706	-6.13479	2.49	0.996436	0.00356401	4.82e-08	100/0/0
		RMS [mm]	10.3114	9.70309	-0.608325	1.98	0.0917705	0.900674	0.00755558	9/90/1
		Area[cm2]	7.6616	6.48645	-1.17515	1.47	0.348693	0.650664	0.000643274	35/65/0
		AP disp. [mm]	39.518	36.8666	-2.65141	8.75	0.0905535	0.901724	0.00772272	9/90/1	AP disp. [mm]													AP disp. [mm]
		ML disp. [mm]	39.9853	24.9841	-15.0012	7.73	0.962948	0.0370507	9.6e-07	96/4/0
	SSEC	COP mean speed [mm/s]	44.5661	37.1897	-7.37639	8.46	0.401619	0.597958	0.000423788	40/60/0
		RMS [mm]	20.8176	21.6771	0.859432	3.01	0.00843939	0.905966	0.0855946	1/91/9	ML disp. [mm]													ML disp. [mm]
		Area[cm2]	35.631	27.931	-7.69994	7.15	0.55946	0.440402	0.000137435	56/44/0
		AP disp. [mm]	90.0225	85.2949	-4.72756	20.4	0.0707948	0.918474	0.010731	7/92/1
		ML disp. [mm]	73.0247	66.2687	-6.75595	21.41	0.0944986	0.898206	0.00729542	9/90/1
	LDE	COP mean speed [mm/s]	18.7656	17.7703	-0.995371	2.26	0.140013	0.856027	0.00395923	14/86/0					RIGID SURFACE EYES CLOSED														SOFT SURFACE EYES CLOSED
		RMS [mm]	5.10987	5.5538	0.443923	0.2	1.59696e-07	0.0107018	0.989298	0/1/99
		Area[cm2]	117.944	145.469	27.5251	21.65	4.60038e-05	0.29917	0.700784	0/30/70
		AP disp. [mm]	120.716	131.595	10.8794	14.39	0.000793212	0.681377	0.317829	0/68/32	COP mean speed [mm/s]													COP mean speed [mm/s]
		ML disp. [mm]	147.946	146.892	-1.054	14.81	0.0388914	0.93935	0.0217589	4/94/2
		Lim.COP.Forward [mm]	53.3504	64.3053	10.9549	15.04	0.000918174	0.700084	0.298998	0/70/30
		Lim.COP.Forward-rightward [mm]	58.361	87.4732	29.1121	10.21	5.5203e-09	0.00047584	0.999524	0/0/100	RMS [mm]													RMS [mm]
		Lim.COP.Rightward [mm]	71.9764	68.5889	-3.38756	14	0.0734326	0.916315	0.0102529	7/92/1
		Lim.COP.Backward-rightward [mm]	71.0568	65.1931	-5.86374	11.41	0.173892	0.823325	0.00278291	17/82/0
		Lim.COP.Backward [mm]	67.3966	69.234	1.83744	15.6	0.0178305	0.935577	0.0465929	2/94/5	Area[cm2]													Area[cm2]
		Lim.COP.Backward-leftward [mm]	62.4972	63.2986	0.801389	14.37	0.023226	0.940163	0.0366112	2/94/4
		Lim.COP.Leftward [mm]	74.2517	74.8513	0.599568	13.06	0.0241602	0.940691	0.0351492	2/94/4
		Lim.COP.Forward-leftward [mm]	51.2069	82.2545	31.0476	12.54	4.52081e-08	0.00336104	0.996639	0/0/100	AP disp. [mm]													AP disp. [mm]
		Success.Forward [%]	38.9452	56.998	18.0527	25.77	0.0010647	0.718317	0.280618	0/72/28
		Success.Forward-rightward [%]	54.1667	96.7573	42.5907	13.19	7.05486e-10	5.81306e-05	0.999942	0/0/100
		Success.Rightward [%]	92.9398	85.1508	-7.789	18.13	0.135888	0.859889	0.00422293	14/86/0
		Success.Backward-rightward [%]	75.187	81.6479	6.46091	22.95	0.00854602	0.907228	0.0842255	1/91/8	ML disp. [mm]													ML disp. [mm]
		Success.Backward [%]	95.8549	93.6364	-2.21856	18.51	0.0469123	0.935444	0.0176439	5/94/2
		Success.Backward-leftward [%]	85.875	81.7955	-4.07949	27.69	0.0520567	0.932286	0.0156575	5/93/2
		Success.Leftward [%]	63.7731	90.2665	26.4934	14.37	1.69534e-06	0.0538427	0.946156	0/5/95
		Success.Forward-leftward [%]	54.3933	73.3264	18.9331	16.51	9.3041e-05	0.387619	0.612288	0/39/61											LIMITS OF STABILITY
														COP mean speed [mm/s]
		RSEO: Rigid Surface Eyes Open												RMS [mm]
		RSEC: Rigid Surface Eyes Closed												Area[cm2]
		SSEO: Soft Surface Eyes Open												AP disp. [mm]
		SSEC: Soft Surface Eyes Closed												ML disp. [mm]
														Lim.COP.Forward [mm]
		LDE: Limits Of Stability												Lim.COP.Forward-rightward [mm]
														Lim.COP.Rightward [mm]
														Lim.COP.Backward-rightward [mm]
														Lim.COP.Backward [mm]
														Lim.COP.Backward-leftward [mm]
														Lim.COP.Leftward [mm]
														Lim.COP.Forward-leftward [mm]
														Success.Forward [%]
														Success.Forward-rightward [%]
														Success.Rightward [%]
														Success.Backward-rightward [%]
														Success.Backward [%]
														Success.Backward-leftward [%]
														Success.Leftward [%]
														Success.Forward-leftward [%]

## Sheet: Patient 03
		Patient Code	Age	Gender	Vertigo Aetiology	Anamnesis and Examination	Treatment	Changes in symptomatology	Functional Tests	Balance Test Results	Physician Assessment	Agreement Bal. Test - Phys. Asses.
		03	41	Male	Vestibular	BPPV with associated signs of bilateral hearing loss (detected by audiometry).	VRE	- Falls (last 3 months): 1 to 0. - Instability due to positional change: No changes. - Vertigo episodes (last 3 months): 0 to 0.	Unter: - to - UP: = UST (right/left): imp./imp.	Decrease in static variables and increase in dynamics: improvement	Positive evolution of the patient.	Agre.
	Test	Variables	Value Pre	Value Post	Difference	MDC	% Negative differences	% Trivial differences	% Positive differences
	RSEO	COP mean speed [mm/s]	10.915	7.24118	-3.67381	2.27	0.88323	0.116763	6.59002e-06	88/12/0					RIGID SURFACE EYES OPEN														SOFT SURFACE EYES OPEN
		RMS [mm]	3.68954	4.26411	0.574561	2.59	0.0112419	0.920503	0.0682548	1/92/7
		Area[cm2]	1.28367	1.39015	0.106481	1.38	0.0213352	0.938707	0.0399575	2/94/4
		AP disp. [mm]	12.9073	19.3603	6.45299	11.6	0.00229036	0.802136	0.195574	0/80/20	COP mean speed [mm/s]													COP mean speed [mm/s]
		ML disp. [mm]	16.5189	12.4535	-4.06538	7.05	0.206262	0.791689	0.00204959	21/79/0
	RSEC	COP mean speed [mm/s]	14.8405	10.9124	-3.92812	3.29	0.646718	0.35321	7.21795e-05	65/35/0
		RMS [mm]	6.97421	3.98908	-2.98514	1.88	0.87094	0.129053	7.59813e-06	87/13/0	RMS [mm]													RMS [mm]
		Area[cm2]	5.65385	1.67703	-3.97682	2.04	0.963927	0.036072	9.46415e-07	96/4/0
		AP disp. [mm]	27.8236	16.8797	-10.9439	9.66	0.60194	0.39796	0.000100663	60/40/0
		ML disp. [mm]	28.609	16.9534	-11.6556	8.71	0.744006	0.255963	3.13157e-05	74/26/0	Area[cm2]													Area[cm2]
	SSEO	COP mean speed [mm/s]	17.4965	14.65	-2.8465	2.49	0.609623	0.390282	9.48448e-05	61/39/0
		RMS [mm]	5.85623	5.04962	-0.806612	1.98	0.126774	0.868543	0.00468381	13/87/0
		Area[cm2]	3.08173	2.74298	-0.338749	1.47	0.0709163	0.918148	0.0109359	7/92/1
		AP disp. [mm]	22.3169	19.5251	-2.79172	8.75	0.0955403	0.897297	0.00716275	10/90/1	AP disp. [mm]													AP disp. [mm]
		ML disp. [mm]	22.0868	22.594	0.507263	7.73	0.0222227	0.939797	0.0379801	2/94/4
	SSEC	COP mean speed [mm/s]	51.0831	49.8378	-1.24535	8.46	0.0519607	0.932408	0.0156317	5/93/2
		RMS [mm]	14.0501	14.9651	0.914948	3.01	0.00774467	0.901158	0.0910975	1/90/9	ML disp. [mm]													ML disp. [mm]
		Area[cm2]	24.8098	27.5212	2.71145	7.15	0.00538014	0.878467	0.116153	1/88/12
		AP disp. [mm]	76.1753	56.7154	-19.4599	20.4	0.464285	0.535444	0.000271725	46/54/0
		ML disp. [mm]	64.6814	76.0548	11.3735	21.41	0.00254965	0.814971	0.18248	0/81/18
	LDE	COP mean speed [mm/s]	15.3707	20.1574	4.78666	2.26	3.39207e-07	0.0176788	0.982321	0/2/98					RIGID SURFACE EYES CLOSED														SOFT SURFACE EYES CLOSED
		RMS [mm]	5.22905	5.45727	0.228224	0.2	8.44907e-05	0.390713	0.609203	0/39/61
		Area[cm2]	117.471	146.965	29.4946	21.65	2.73684e-05	0.241299	0.758674	0/24/76
		AP disp. [mm]	113.236	149.553	36.3165	14.39	3.43264e-08	0.00264171	0.997358	0/0/100	COP mean speed [mm/s]													COP mean speed [mm/s]
		ML disp. [mm]	154.748	145.487	-9.26054	14.81	0.233953	0.764471	0.00157638	23/76/0
		Lim.COP.Forward [mm]	40.606	97.9726	57.3666	15.04	3.38368e-11	2.00675e-06	0.999998	0/0/100
		Lim.COP.Forward-rightward [mm]	63.9294	95.0599	31.1305	10.21	1.87206e-09	0.000160595	0.999839	0/0/100	RMS [mm]													RMS [mm]
		Lim.COP.Rightward [mm]	75.9591	57.2793	-18.6798	14	0.741537	0.258431	3.20944e-05	74/26/0
		Lim.COP.Backward-rightward [mm]	67.2755	63.1505	-4.12507	11.41	0.109855	0.884275	0.00586981	11/88/1
		Lim.COP.Backward [mm]	69.5189	41.6468	-27.8721	15.6	0.933647	0.0663504	2.36601e-06	93/7/0	Area[cm2]													Area[cm2]
		Lim.COP.Backward-leftward [mm]	66.8396	42.7637	-24.0759	14.37	0.90264	0.0973553	4.50291e-06	90/10/0
		Lim.COP.Leftward [mm]	73.4933	79.4314	5.93813	13.06	0.00372037	0.849895	0.146385	0/85/15
		Lim.COP.Forward-leftward [mm]	46.2508	94.9012	48.6505	12.54	2.45192e-11	1.38119e-06	0.999999	0/0/100	AP disp. [mm]													AP disp. [mm]
		Success.Forward [%]	46.1315	90.9091	44.7776	25.77	3.13589e-06	0.0788517	0.921145	0/8/92
		Success.Forward-rightward [%]	73.4531	65.8026	-7.6505	13.19	0.20808	0.789938	0.00198168	21/79/0
		Success.Rightward [%]	78.3574	57.6796	-20.6778	18.13	0.607627	0.392276	9.65601e-05	61/39/0
		Success.Backward-rightward [%]	94.0048	55.7416	-38.2632	22.95	0.899992	0.100004	4.7165e-06	90/10/0	ML disp. [mm]													ML disp. [mm]
		Success.Backward [%]	92.25	39.3789	-52.8711	18.51	0.999537	0.000462754	5.36152e-09	100/0/0
		Success.Backward-leftward [%]	96.7626	38.756	-58.0066	27.69	0.980342	0.0196581	3.9695e-07	98/2/0
		Success.Leftward [%]	85.2222	58.4444	-26.7778	14.37	0.950005	0.0499937	1.51181e-06	95/5/0
		Success.Forward-leftward [%]	54.7453	68.3948	13.6496	16.51	0.00054414	0.631285	0.368171	0/63/37											LIMITS OF STABILITY
														COP mean speed [mm/s]
		RSEO: Rigid Surface Eyes Open												RMS [mm]
		RSEC: Rigid Surface Eyes Closed												Area[cm2]
		SSEO: Soft Surface Eyes Open												AP disp. [mm]
		SSEC: Soft Surface Eyes Closed												ML disp. [mm]
														Lim.COP.Forward [mm]
		LDE: Limits Of Stability												Lim.COP.Forward-rightward [mm]
														Lim.COP.Rightward [mm]
														Lim.COP.Backward-rightward [mm]
														Lim.COP.Backward [mm]
														Lim.COP.Backward-leftward [mm]
														Lim.COP.Leftward [mm]
														Lim.COP.Forward-leftward [mm]
														Success.Forward [%]
														Success.Forward-rightward [%]
														Success.Rightward [%]
														Success.Backward-rightward [%]
														Success.Backward [%]
														Success.Backward-leftward [%]
														Success.Leftward [%]
														Success.Forward-leftward [%]

## Sheet: Patient 04
		Patient Code	Age	Gender	Vertigo Aetiology	Anamnesis and Examination	Treatment	Changes in symptomatology	Functional Tests	Balance Test Results	Physician Assessment	Agreement Bal. Test - Phys. Asses.
		04	39	Female	Vestibular	Otoesclerosis. Bilateral hearing loss.	VRE	- Falls (last 3 months): 0 to 0. - Instability due to positional change: No changes. - Vertigo episodes (last 3 months): 0 to 0.	Unter: + to + UP: = UST (right/left): =/=	No changes in the variables.	No evolution detected.	Agre.
	Test	Variables	Value Pre	Value Post	Difference	MDC	% Negative differences	% Trivial differences	% Positive differences
	RSEO	COP mean speed [mm/s]	5.16774	4.98092	-0.186824	2.27	0.0404972	0.938803	0.0206995	4/94/2					RIGID SURFACE EYES OPEN														SOFT SURFACE EYES OPEN
		RMS [mm]	3.15766	2.66572	-0.491937	2.59	0.0608426	0.926184	0.0129736	6/93/1
		Area[cm2]	0.639422	0.481844	-0.157578	1.38	0.0460873	0.935696	0.018217	5/94/2
		AP disp. [mm]	12.1424	8.17587	-3.96652	11.6	0.103272	0.890206	0.00652226	10/89/1	COP mean speed [mm/s]													COP mean speed [mm/s]
		ML disp. [mm]	9.72444	10.2151	0.490614	7.05	0.0219571	0.93935	0.0386925	2/94/4
	RSEC	COP mean speed [mm/s]	5.90453	7.178	1.27347	3.29	0.00522043	0.875448	0.119332	1/88/12
		RMS [mm]	2.81143	4.30979	1.49837	1.88	0.000645763	0.652528	0.346826	0/65/35	RMS [mm]													RMS [mm]
		Area[cm2]	0.644019	1.29544	0.651418	2.04	0.00723293	0.896757	0.0960099	1/90/10
		AP disp. [mm]	9.29039	16.5001	7.20975	9.66	0.00083684	0.68795	0.311213	0/69/31
		ML disp. [mm]	10.883	13.7814	2.89841	8.71	0.00671416	0.893313	0.0999731	1/89/10	Area[cm2]													Area[cm2]
	SSEO	COP mean speed [mm/s]	14.3512	13.8108	-0.540353	2.49	0.0671969	0.921323	0.0114797	7/92/1
		RMS [mm]	9.09599	8.39594	-0.700047	1.98	0.106907	0.887024	0.00606889	11/89/1
		Area[cm2]	5.74895	6.33955	0.590597	1.47	0.00490059	0.8699	0.125199	0/87/13
		AP disp. [mm]	24.6086	33.589	8.98042	8.75	0.00018212	0.47939	0.520428	0/48/52	AP disp. [mm]													AP disp. [mm]
		ML disp. [mm]	34.064	26.4917	-7.57231	7.73	0.484166	0.515599	0.000235031	48/52/0
	SSEC	COP mean speed [mm/s]	37.6196	27.2399	-10.3796	8.46	0.670373	0.329568	5.87347e-05	67/33/0
		RMS [mm]	14.5328	10.9717	-3.56112	3.01	0.638864	0.361059	7.67648e-05	64/36/0	ML disp. [mm]													ML disp. [mm]
		Area[cm2]	16.9839	10.347	-6.6369	7.15	0.444495	0.555192	0.000313008	44/56/0
		AP disp. [mm]	57.4177	47.8676	-9.55013	20.4	0.152364	0.844151	0.00348519	15/84/0
		ML disp. [mm]	50.6629	39.2092	-11.4537	21.41	0.18438	0.813118	0.00250193	18/81/0
	LDE	COP mean speed [mm/s]	18.2846	16.1912	-2.09343	2.26	0.442928	0.55676	0.000311979	44/56/0					RIGID SURFACE EYES CLOSED														SOFT SURFACE EYES CLOSED
		RMS [mm]	5.31838	5.09203	-0.226352	0.2	0.602132	0.397779	8.91191e-05	60/40/0
		Area[cm2]	124.831	103.917	-20.9137	21.65	0.473633	0.526112	0.000255026	47/53/0
		AP disp. [mm]	132.974	117.645	-15.3293	14.39	0.550517	0.449336	0.000146644	55/45/0	COP mean speed [mm/s]													COP mean speed [mm/s]
		ML disp. [mm]	136.293	129.454	-6.83877	14.81	0.149577	0.846821	0.00360192	15/85/0
		Lim.COP.Forward [mm]	62.9581	50.3796	-12.5785	15.04	0.375185	0.624299	0.000515743	38/62/0
		Lim.COP.Forward-rightward [mm]	80.2854	68.1554	-12.13	10.21	0.642609	0.357317	7.35869e-05	64/36/0	RMS [mm]													RMS [mm]
		Lim.COP.Rightward [mm]	62.6717	66.1576	3.48588	14	0.00992859	0.914808	0.0752636	1/91/8
		Lim.COP.Backward-rightward [mm]	65.1554	57.8751	-7.28021	11.41	0.241585	0.756937	0.00147814	24/76/0
		Lim.COP.Backward [mm]	54.1143	63.7204	9.60601	15.6	0.00165709	0.769936	0.228407	0/77/23	Area[cm2]													Area[cm2]
		Lim.COP.Backward-leftward [mm]	57.8202	57.1354	-0.684859	14.37	0.0354525	0.940518	0.0240292	4/94/2
		Lim.COP.Leftward [mm]	70.3279	63.5659	-6.76203	13.06	0.175651	0.821631	0.00271805	18/82/0
		Lim.COP.Forward-leftward [mm]	72.2157	62.2652	-9.95049	12.54	0.344165	0.655184	0.000651122	34/66/0	AP disp. [mm]													AP disp. [mm]
		Success.Forward [%]	74.1214	57.2495	-16.8719	25.77	0.251641	0.747007	0.00135282	25/75/0
		Success.Forward-rightward [%]	78.3754	72.3987	-5.97673	13.19	0.14569	0.850563	0.00374681	15/85/0
		Success.Rightward [%]	85.7143	79.4189	-6.2954	18.13	0.10489	0.888828	0.00628217	10/89/1
		Success.Backward-rightward [%]	70.4042	87.1094	16.7052	22.95	0.000922249	0.700372	0.298706	0/70/30	ML disp. [mm]													ML disp. [mm]
		Success.Backward [%]	78.3784	91.6442	13.2658	18.51	0.000976532	0.707832	0.291192	0/71/29
		Success.Backward-leftward [%]	85.2865	82.9649	-2.32157	27.69	0.040846	0.938548	0.0206058	4/94/2
		Success.Leftward [%]	77.6029	85.3511	7.74818	14.37	0.00244488	0.811075	0.18648	0/81/19
		Success.Forward-leftward [%]	69.7802	61.0318	-8.74839	16.51	0.181774	0.815662	0.00256429	18/82/0											LIMITS OF STABILITY
														COP mean speed [mm/s]
		RSEO: Rigid Surface Eyes Open												RMS [mm]
		RSEC: Rigid Surface Eyes Closed												Area[cm2]
		SSEO: Soft Surface Eyes Open												AP disp. [mm]
		SSEC: Soft Surface Eyes Closed												ML disp. [mm]
														Lim.COP.Forward [mm]
		LDE: Limits Of Stability												Lim.COP.Forward-rightward [mm]
														Lim.COP.Rightward [mm]
														Lim.COP.Backward-rightward [mm]
														Lim.COP.Backward [mm]
														Lim.COP.Backward-leftward [mm]
														Lim.COP.Leftward [mm]
														Lim.COP.Forward-leftward [mm]
														Success.Forward [%]
														Success.Forward-rightward [%]
														Success.Rightward [%]
														Success.Backward-rightward [%]
														Success.Backward [%]
														Success.Backward-leftward [%]
														Success.Leftward [%]
														Success.Forward-leftward [%]

## Sheet: Patient 05
		Patient Code	Age	Gender	Vertigo Aetiology	Anamnesis and Examination	Treatment	Changes in symptomatology	Functional Tests	Balance Test Results	Physician Assessment	Agreement Bal. Test - Phys. Asses.
		05	43	Male	Vestibular	Ménière syndrome. Unilateral tinnitus and pathological nystagmus.	VRE	- Falls (last 3 months): 0 to 2. - Instability due to positional change: No changes. - Vertigo episodes (last 3 months): Some episodes (duration: minutes) to some episodes (duration: minutes).	Unter: + to + UP: = UST (right/left): wor./wor.	Increase in static variables and decrease in dynamics: worsening.	Negative evolution of the patient.	Agre.
	Test	Variables	Value Pre	Value Post	Difference	MDC	% Negative differences	% Trivial differences	% Positive differences
	RSEO	COP mean speed [mm/s]	16.9638	19.455	2.49123	2.27	0.000125455	0.424601	0.575274	0/42/58					RIGID SURFACE EYES OPEN														SOFT SURFACE EYES OPEN
		RMS [mm]	5.02864	5.44058	0.411936	2.59	0.0148769	0.930816	0.054307	1/93/5
		Area[cm2]	3.46759	4.06277	0.595185	1.38	0.00424209	0.859092	0.136666	0/86/14
		AP disp. [mm]	21.3888	21.6152	0.226409	11.6	0.0271689	0.94099	0.0318412	3/94/3	COP mean speed [mm/s]													COP mean speed [mm/s]
		ML disp. [mm]	34.5307	31.0588	-3.47192	7.05	0.163507	0.833368	0.00312561	16/83/0
	RSEC	COP mean speed [mm/s]	25.906	33.0881	7.18216	3.29	2.44054e-07	0.0134492	0.986551	0/1/99
		RMS [mm]	9.45747	8.65433	-0.803139	1.88	0.135133	0.860564	0.00430358	14/86/0	RMS [mm]													RMS [mm]
		Area[cm2]	7.67323	9.4251	1.75186	2.04	0.000465174	0.607542	0.391993	0/61/39
		AP disp. [mm]	33.7946	44.1504	10.3558	9.66	0.000141584	0.44416	0.555699	0/44/56
		ML disp. [mm]	33.9213	33.6384	-0.282863	8.71	0.0333365	0.941091	0.0255725	3/94/3	Area[cm2]													Area[cm2]
	SSEO	COP mean speed [mm/s]	23.8159	20.3254	-3.49052	2.49	0.781716	0.218262	2.17727e-05	78/22/0
		RMS [mm]	7.53038	6.22329	-1.30708	1.98	0.254888	0.743803	0.00130979	25/74/0
		Area[cm2]	5.8056	3.83945	-1.96615	1.47	0.743107	0.25686	3.24159e-05	74/26/0
		AP disp. [mm]	37.0291	36.8758	-0.153301	8.75	0.0313868	0.94141	0.0272035	3/94/3	AP disp. [mm]													AP disp. [mm]
		ML disp. [mm]	27.9967	18.9169	-9.07976	7.73	0.632887	0.367034	7.90216e-05	63/37/0
	SSEC	COP mean speed [mm/s]	44.67	54.4979	9.82793	8.46	8.4951e-05	0.376506	0.623409	0/38/62
		RMS [mm]	13.5074	15.476	1.96855	3.01	0.00137039	0.747198	0.251432	0/75/25	ML disp. [mm]													ML disp. [mm]
		Area[cm2]	17.833	24.6959	6.86286	7.15	0.000263136	0.530871	0.468866	0/53/47
		AP disp. [mm]	51.4807	63.0966	11.6159	20.4	0.00209607	0.795549	0.202355	0/80/20
		ML disp. [mm]	67.3989	61.1355	-6.26344	21.41	0.087471	0.904404	0.00812468	9/90/1
	LDE	COP mean speed [mm/s]	18.5057	19.1645	0.658779	2.26	0.00808652	0.905088	0.0868257	1/91/9					RIGID SURFACE EYES CLOSED														SOFT SURFACE EYES CLOSED
		RMS [mm]	4.32333	4.49707	0.173749	0.2	0.000389241	0.60136	0.398251	0/60/40
		Area[cm2]	75.5567	66.0296	-9.52702	21.65	0.14022	0.85577	0.00401058	14/86/0
		AP disp. [mm]	96.8034	92.2532	-4.55019	14.39	0.0946423	0.898098	0.00726006	9/90/1	COP mean speed [mm/s]													COP mean speed [mm/s]
		ML disp. [mm]	116.898	112.169	-4.72849	14.81	0.0956503	0.897186	0.00716328	10/90/1
		Lim.COP.Forward [mm]	50.4896	48.0282	-2.46144	15.04	0.0553122	0.930122	0.0145657	6/93/1
		Lim.COP.Forward-rightward [mm]	36.9788	46.134	9.1552	10.21	0.000371946	0.579244	0.420384	0/58/42	RMS [mm]													RMS [mm]
		Lim.COP.Rightward [mm]	48.0655	57.6916	9.62608	14	0.00114005	0.726595	0.272265	0/73/27
		Lim.COP.Backward-rightward [mm]	50.9059	48.2355	-2.67041	11.41	0.0714489	0.917908	0.0106429	7/92/1
		Lim.COP.Backward [mm]	32.1934	41.6165	9.42315	15.6	0.00176005	0.776581	0.221659	0/78/22	Area[cm2]													Area[cm2]
		Lim.COP.Backward-leftward [mm]	49.1317	40.8613	-8.27037	14.37	0.205739	0.792225	0.00203599	21/79/0
		Lim.COP.Leftward [mm]	67.3774	45.4625	-21.915	13.06	0.903567	0.0964287	4.4063e-06	90/10/0
		Lim.COP.Forward-leftward [mm]	71.312	66.7157	-4.59632	12.54	0.111607	0.882666	0.00572712	11/88/1	AP disp. [mm]													AP disp. [mm]
		Success.Forward [%]	40.1005	53.0592	12.9587	25.77	0.00293559	0.828585	0.168479	0/83/17
		Success.Forward-rightward [%]	31.8465	53.7824	21.9359	13.19	4.79865e-06	0.101283	0.898712	0/10/90
		Success.Rightward [%]	58.3238	71.4943	13.1705	18.13	0.000930686	0.701305	0.297764	0/70/30
		Success.Backward-rightward [%]	83.0025	87.7627	4.76019	22.95	0.0119941	0.923066	0.0649402	1/92/6	ML disp. [mm]													ML disp. [mm]
		Success.Backward [%]	76.8041	69.7165	-7.08763	18.51	0.1175	0.877216	0.00528339	12/88/1
		Success.Backward-leftward [%]	80.3218	48.2673	-32.0545	27.69	0.620349	0.379563	8.73868e-05	62/38/0
		Success.Leftward [%]	77.8161	76.4368	-1.37931	14.37	0.0428211	0.937612	0.0195665	4/94/2
		Success.Forward-leftward [%]	33.5062	60.9959	27.4896	16.51	4.77645e-06	0.10073	0.899265	0/10/90											LIMITS OF STABILITY
														COP mean speed [mm/s]
		RSEO: Rigid Surface Eyes Open												RMS [mm]
		RSEC: Rigid Surface Eyes Closed												Area[cm2]
		SSEO: Soft Surface Eyes Open												AP disp. [mm]
		SSEC: Soft Surface Eyes Closed												ML disp. [mm]
														Lim.COP.Forward [mm]
		LDE: Limits Of Stability												Lim.COP.Forward-rightward [mm]
														Lim.COP.Rightward [mm]
														Lim.COP.Backward-rightward [mm]
														Lim.COP.Backward [mm]
														Lim.COP.Backward-leftward [mm]
														Lim.COP.Leftward [mm]
														Lim.COP.Forward-leftward [mm]
														Success.Forward [%]
														Success.Forward-rightward [%]
														Success.Rightward [%]
														Success.Backward-rightward [%]
														Success.Backward [%]
														Success.Backward-leftward [%]
														Success.Leftward [%]
														Success.Forward-leftward [%]

## Sheet: Patient 06
		Patient Code	Age	Gender	Vertigo Aetiology	Anamnesis and Examination	Treatment	Changes in symptomatology	Functional Tests	Balance Test Results	Physician Assessment	Agreement Bal. Test - Phys. Asses.
		06	54	Male	Vestibular	Ménière syndrome. Unilateral tinnitus.	VRE	- Falls (last 3 months): 2 to 8. - Instability due to positional change: No changes. - Vertigo episodes (last 3 months): Continuous to continuous.	Unter: + to + UP: wor. UST (right/left): wor./wor.	Increase in static variables and decrease in dynamics: worsening.	Negative evolution of the patient.	Agre. The patient could only perform one test (RSEO).
	Test	Variables	Value Pre	Value Post	Difference	MDC	% Negative differences	% Trivial differences	% Positive differences
	RSEO	COP mean speed [mm/s]	27.8403	76.1536	48.3133	2.27	2.01092e-30	0	1	0/0/100					RIGID SURFACE EYES OPEN														SOFT SURFACE EYES OPEN
		RMS [mm]	11.2089	28.8977	17.6887	2.59	1.25624e-16	3.80362e-13	1	0/0/100
		Area[cm2]	13.0035	66.7967	53.7931	1.38	1.91436e-38	0	1	0/0/100
		AP disp. [mm]	55.9841	115.559	59.5752	11.6	1.04615e-13	1.48676e-09	1	0/0/100	COP mean speed [mm/s]													COP mean speed [mm/s]
		ML disp. [mm]	42.0276	87.2493	45.2217	7.05	5.93338e-16	2.55496e-12	1	0/0/100
	RSEC	COP mean speed [mm/s]								0/0/0
		RMS [mm]								0/0/0	RMS [mm]													RMS [mm]
		Area[cm2]								0/0/0
		AP disp. [mm]								0/0/0
		ML disp. [mm]								0/0/0	Area[cm2]													Area[cm2]
	SSEO	COP mean speed [mm/s]								0/0/0
		RMS [mm]								0/0/0
		Area[cm2]								0/0/0
		AP disp. [mm]								0/0/0	AP disp. [mm]													AP disp. [mm]
		ML disp. [mm]								0/0/0
	SSEC	COP mean speed [mm/s]								0/0/0
		RMS [mm]								0/0/0	ML disp. [mm]													ML disp. [mm]
		Area[cm2]								0/0/0
		AP disp. [mm]								0/0/0
		ML disp. [mm]								0/0/0
	LDE	COP mean speed [mm/s]								0/0/0					RIGID SURFACE EYES CLOSED														SOFT SURFACE EYES CLOSED
		RMS [mm]								0/0/0
		Area[cm2]								0/0/0
		AP disp. [mm]								0/0/0	COP mean speed [mm/s]													COP mean speed [mm/s]
		ML disp. [mm]								0/0/0
		Lim.COP.Forward [mm]								0/0/0
		Lim.COP.Forward-rightward [mm]								0/0/0	RMS [mm]													RMS [mm]
		Lim.COP.Rightward [mm]								0/0/0
		Lim.COP.Backward-rightward [mm]								0/0/0
		Lim.COP.Backward [mm]								0/0/0	Area[cm2]													Area[cm2]
		Lim.COP.Backward-leftward [mm]								0/0/0
		Lim.COP.Leftward [mm]								0/0/0
		Lim.COP.Forward-leftward [mm]								0/0/0	AP disp. [mm]													AP disp. [mm]
		Success.Forward [%]								0/0/0
		Success.Forward-rightward [%]								0/0/0
		Success.Rightward [%]								0/0/0
		Success.Backward-rightward [%]								0/0/0	ML disp. [mm]													ML disp. [mm]
		Success.Backward [%]								0/0/0
		Success.Backward-leftward [%]								0/0/0
		Success.Leftward [%]								0/0/0
		Success.Forward-leftward [%]								0/0/0											LIMITS OF STABILITY
														COP mean speed [mm/s]
		RSEO: Rigid Surface Eyes Open												RMS [mm]
		RSEC: Rigid Surface Eyes Closed												Area[cm2]
		SSEO: Soft Surface Eyes Open												AP disp. [mm]
		SSEC: Soft Surface Eyes Closed												ML disp. [mm]
														Lim.COP.Forward [mm]
		LDE: Limits Of Stability												Lim.COP.Forward-rightward [mm]
														Lim.COP.Rightward [mm]
														Lim.COP.Backward-rightward [mm]
														Lim.COP.Backward [mm]
														Lim.COP.Backward-leftward [mm]
														Lim.COP.Leftward [mm]
														Lim.COP.Forward-leftward [mm]
														Success.Forward [%]
														Success.Forward-rightward [%]
														Success.Rightward [%]
														Success.Backward-rightward [%]
														Success.Backward [%]
														Success.Backward-leftward [%]
														Success.Leftward [%]
														Success.Forward-leftward [%]

## Sheet: Patient 07
		Patient Code	Age	Gender	Vertigo Aetiology	Anamnesis and Examination	Treatment	Changes in symptomatology	Functional Tests	Balance Test Results	Physician Assessment	Agreement Bal. Test - Phys. Asses.
		07	60	Female	Vestibular	Vestibular hypofunction. Pathological nystagmus.	VRE	- Falls (last 3 months): 3 to 0. - Instability due to positional change: No changes. - Vertigo episodes (last 3 months): Some episodes (duration: days) to some episodes (duration: days).	Unter: + to + UP: = UST (right/left): imp./imp.	Increase in static variables and decrease in dynamics: worsening.	No evolution detected.	Disa.
	Test	Variables	Value Pre	Value Post	Difference	MDC	% Negative differences	% Trivial differences	% Positive differences
	RSEO	COP mean speed [mm/s]	8.78779	14.0676	5.27984	2.27	1.17963e-07	0.00693833	0.993062	0/1/99					RIGID SURFACE EYES OPEN														SOFT SURFACE EYES OPEN
		RMS [mm]	4.99039	5.68417	0.693774	2.59	0.00911252	0.910671	0.0802168	1/91/8
		Area[cm2]	1.96788	2.51777	0.549886	1.38	0.00497186	0.871465	0.123563	0/87/12
		AP disp. [mm]	16.6871	22.8874	6.20034	11.6	0.00255501	0.813148	0.184297	0/81/18	COP mean speed [mm/s]													COP mean speed [mm/s]
		ML disp. [mm]	19.5392	16.7206	-2.81859	7.05	0.12391	0.871174	0.00491633	12/87/0
	RSEC	COP mean speed [mm/s]	14.2757	16.3355	2.05981	3.29	0.00158306	0.763778	0.234639	0/76/23
		RMS [mm]	5.28619	7.01374	1.72754	1.88	0.000334062	0.562246	0.43742	0/56/44	RMS [mm]													RMS [mm]
		Area[cm2]	2.13727	4.02184	1.88457	2.04	0.00032665	0.558477	0.441196	0/56/44
		AP disp. [mm]	21.8442	31.7977	9.9535	9.66	0.00017855	0.476261	0.523561	0/48/52
		ML disp. [mm]	19.1297	27.3786	8.2489	8.71	0.00028224	0.540728	0.45899	0/54/46	Area[cm2]													Area[cm2]
	SSEO	COP mean speed [mm/s]	18.9575	19.4891	0.531549	2.49	0.0116647	0.921984	0.0663513	1/92/7
		RMS [mm]	9.38942	10.8622	1.47279	1.98	0.000843496	0.689765	0.309391	0/69/31
		Area[cm2]	6.24657	7.75827	1.5117	1.47	0.000184812	0.477863	0.521952	0/48/52
		AP disp. [mm]	42.7706	44.8882	2.11758	8.75	0.0102411	0.916349	0.0734098	1/92/7	AP disp. [mm]													AP disp. [mm]
		ML disp. [mm]	25.8909	32.5427	6.65188	7.73	0.000451016	0.606457	0.393092	0/61/39
	SSEC	COP mean speed [mm/s]	37.1209	39.1937	2.07278	8.46	0.0100791	0.91581	0.0741109	1/92/7
		RMS [mm]	14.8331	14.5177	-0.315444	3.01	0.0444722	0.936588	0.0189403	4/94/2	ML disp. [mm]													ML disp. [mm]
		Area[cm2]	17.0578	21.6298	4.57199	7.15	0.00146323	0.756196	0.242341	0/76/24
		AP disp. [mm]	62.5364	57.3479	-5.18847	20.4	0.0766442	0.913678	0.00967767	8/91/1
		ML disp. [mm]	49.0867	72.7489	23.6622	21.41	0.000117695	0.418855	0.581027	0/42/58
	LDE	COP mean speed [mm/s]	13.7371	17.1851	3.448	2.26	1.04619e-05	0.154838	0.845151	0/15/85					RIGID SURFACE EYES CLOSED														SOFT SURFACE EYES CLOSED
		RMS [mm]	4.68967	5.30808	0.61841	0.2	1.17628e-09	0.000111676	0.999888	0/0/100
		Area[cm2]	78.6395	128.993	50.3536	21.65	1.06032e-07	0.0069498	0.99305	0/1/99
		AP disp. [mm]	101.417	122.294	20.8767	14.39	1.64161e-05	0.191634	0.80835	0/19/81	COP mean speed [mm/s]													COP mean speed [mm/s]
		ML disp. [mm]	106.33	133.593	27.2628	14.81	1.72625e-06	0.0544286	0.94557	0/5/95
		Lim.COP.Forward [mm]	57.7091	66.6725	8.96349	15.04	0.00182995	0.781156	0.217014	0/78/22
		Lim.COP.Forward-rightward [mm]	51.5281	81.4074	29.8793	10.21	3.65234e-09	0.000316072	0.999684	0/0/100	RMS [mm]													RMS [mm]
		Lim.COP.Rightward [mm]	53.7554	67.7346	13.9792	14	0.000212898	0.500942	0.498845	0/50/50
		Lim.COP.Backward-rightward [mm]	53.2017	61.6177	8.416	11.41	0.000877683	0.693841	0.305281	0/69/31
		Lim.COP.Backward [mm]	43.9461	56.4025	12.4564	15.6	0.000634028	0.651635	0.347731	0/65/35	Area[cm2]													Area[cm2]
		Lim.COP.Backward-leftward [mm]	51.6282	65.8	14.1718	14.37	0.000228079	0.510472	0.4893	0/51/49
		Lim.COP.Leftward [mm]	42.0943	52.6659	10.5716	13.06	0.000595089	0.643842	0.355563	0/64/36
		Lim.COP.Forward-leftward [mm]	64.9916	77.0785	12.0869	12.54	0.000258044	0.527752	0.47199	0/53/47	AP disp. [mm]													AP disp. [mm]
		Success.Forward [%]	70.1477	61.4331	-8.71459	25.77	0.101785	0.891665	0.00654938	10/89/1
		Success.Forward-rightward [%]	57.3449	91.6304	34.2855	13.19	2.23025e-08	0.00179489	0.998205	0/0/100
		Success.Rightward [%]	88.9423	85.2163	-3.72596	18.13	0.0645263	0.923366	0.0121077	6/92/1
		Success.Backward-rightward [%]	85.1804	80.6701	-4.51031	22.95	0.0624349	0.924969	0.0125956	6/92/1	ML disp. [mm]													ML disp. [mm]
		Success.Backward [%]	80.2403	92.9144	12.6741	18.51	0.00115516	0.728449	0.270396	0/73/27
		Success.Backward-leftward [%]	83.6551	88.5309	4.87584	27.69	0.0137893	0.92829	0.0579203	1/93/6
		Success.Leftward [%]	75.1799	67.0673	-8.11255	14.37	0.199765	0.798085	0.00215009	20/80/0
		Success.Forward-leftward [%]	69.4233	82.8976	13.4743	16.51	0.000576127	0.638986	0.360437	0/64/36											LIMITS OF STABILITY
														COP mean speed [mm/s]
		RSEO: Rigid Surface Eyes Open												RMS [mm]
		RSEC: Rigid Surface Eyes Closed												Area[cm2]
		SSEO: Soft Surface Eyes Open												AP disp. [mm]
		SSEC: Soft Surface Eyes Closed												ML disp. [mm]
														Lim.COP.Forward [mm]
		LDE: Limits Of Stability												Lim.COP.Forward-rightward [mm]
														Lim.COP.Rightward [mm]
														Lim.COP.Backward-rightward [mm]
														Lim.COP.Backward [mm]
														Lim.COP.Backward-leftward [mm]
														Lim.COP.Leftward [mm]
														Lim.COP.Forward-leftward [mm]
														Success.Forward [%]
														Success.Forward-rightward [%]
														Success.Rightward [%]
														Success.Backward-rightward [%]
														Success.Backward [%]
														Success.Backward-leftward [%]
														Success.Leftward [%]
														Success.Forward-leftward [%]

## Sheet: Patient 08
		Patient Code	Age	Gender	Vertigo Aetiology	Anamnesis and Examination	Treatment	Changes in symptomatology	Functional Tests	Balance Test Results	Physician Assessment	Agreement Bal. Test - Phys. Asses.
		08	55	Male	Vestibular	BPPV with associated signs of bilateral hearing loss (detected by audiometry).	VRE	- Falls (last 3 months): 3 to 3. - Instability due to positional change: No changes. - Vertigo episodes (last 3 months): Some episodes (duration: hours) to some episodes (duration: hours).	Unter: + to + UP: = UST (right/left): imp./imp.	Increase in static variables and decrease in dynamics: worsening.	No evolution detected.	Disa. The patient could not perform the SSEC test.
	Test	Variables	Value Pre	Value Post	Difference	MDC	% Negative differences	% Trivial differences	% Positive differences
	RSEO	COP mean speed [mm/s]	13.5694	42.8246	29.2553	2.27	5.03689e-24	0	1	0/0/100					RIGID SURFACE EYES OPEN														SOFT SURFACE EYES OPEN
		RMS [mm]	9.78841	16.0659	6.27745	2.59	6.8731e-08	0.00435659	0.995643	0/0/100
		Area[cm2]	6.22991	13.2562	7.02628	1.38	1.2553e-13	1.86575e-09	1	0/0/100
		AP disp. [mm]	35.8996	75.7619	39.8623	11.6	3.1125e-10	1.91737e-05	0.999981	0/0/100	COP mean speed [mm/s]													COP mean speed [mm/s]
		ML disp. [mm]	35.5915	34.7608	-0.830699	7.05	0.0466189	0.93551	0.0178716	5/94/2
	RSEC	COP mean speed [mm/s]	47.5076	91.0408	43.5333	3.29	8.26428e-25	0	1	0/0/100
		RMS [mm]	14.255	21.9673	7.71233	1.88	8.34336e-12	3.89335e-07	1	0/0/100	RMS [mm]													RMS [mm]
		Area[cm2]	17.0997	39.418	22.3182	2.04	2.10493e-22	0	1	0/0/100
		AP disp. [mm]	82.1565	117.142	34.9859	9.66	9.09181e-11	6.1422e-06	0.999994	0/0/100
		ML disp. [mm]	43.3889	71.9582	28.5692	8.71	5.40758e-10	4.36392e-05	0.999956	0/0/100	Area[cm2]													Area[cm2]
	SSEO	COP mean speed [mm/s]	19.0839	37.9658	18.8819	2.49	4.68957e-18	9.54792e-15	1	0/0/100
		RMS [mm]	9.05597	18.0953	9.03936	1.98	8.68518e-13	2.69566e-08	1	0/0/100
		Area[cm2]	6.8908	19.4621	12.5713	1.47	2.03677e-19	2.22045e-16	1	0/0/100
		AP disp. [mm]	42.3833	70.3014	27.9181	8.75	8.71454e-10	7.24839e-05	0.999928	0/0/100	AP disp. [mm]													AP disp. [mm]
		ML disp. [mm]	29.6669	42.3984	12.7315	7.73	5.25942e-06	0.106703	0.893292	0/11/89
	SSEC	COP mean speed [mm/s]								0/0/0
		RMS [mm]								0/0/0	ML disp. [mm]													ML disp. [mm]
		Area[cm2]								0/0/0
		AP disp. [mm]								0/0/0
		ML disp. [mm]								0/0/0
	LDE	COP mean speed [mm/s]	15.0462	14.6835	-0.362738	2.26	0.0544513	0.930875	0.0146741	5/93/1					RIGID SURFACE EYES CLOSED														SOFT SURFACE EYES CLOSED
		RMS [mm]	5.02008	5.1789	0.158824	0.2	0.000585326	0.656383	0.343032	0/66/34
		Area[cm2]	103.113	121.86	18.7476	21.65	0.000440662	0.602357	0.397202	0/60/40
		AP disp. [mm]	115.268	125.914	10.6461	14.39	0.0008645	0.692409	0.306727	0/69/31	COP mean speed [mm/s]													COP mean speed [mm/s]
		ML disp. [mm]	132.659	135.881	3.22189	14.81	0.0114576	0.921198	0.0673442	1/92/7
		Lim.COP.Forward [mm]	58.2864	70.9501	12.6637	15.04	0.000500199	0.620135	0.379365	0/62/38
		Lim.COP.Forward-rightward [mm]	69.3603	64.8374	-4.52295	10.21	0.141412	0.854641	0.00394665	14/85/0	RMS [mm]													RMS [mm]
		Lim.COP.Rightward [mm]	66.0244	67.2289	1.20449	14	0.0204259	0.93836	0.0412145	2/94/4
		Lim.COP.Backward-rightward [mm]	53.4653	62.6711	9.2058	11.41	0.000606888	0.645663	0.35373	0/65/35
		Lim.COP.Backward [mm]	57.8833	54.3182	-3.56507	15.6	0.0700502	0.919043	0.0109072	7/92/1	Area[cm2]													Area[cm2]
		Lim.COP.Backward-leftward [mm]	61.5576	65.0655	3.50789	14.37	0.0101574	0.915839	0.0740031	1/92/7
		Lim.COP.Leftward [mm]	66.7704	70.795	4.02462	13.06	0.00753044	0.900377	0.0920923	1/90/9
		Lim.COP.Forward-leftward [mm]	55.6921	71.5566	15.8645	12.54	4.76748e-05	0.303381	0.696571	0/30/70	AP disp. [mm]													AP disp. [mm]
		Success.Forward [%]	72.043	72.6588	0.615762	25.77	0.026511	0.941268	0.0322207	3/94/3
		Success.Forward-rightward [%]	73.7251	71.0963	-2.62871	13.19	0.0629829	0.924607	0.0124104	6/92/1
		Success.Rightward [%]	92.4113	72.5826	-19.8286	18.13	0.572272	0.427602	0.000125586	57/43/0
		Success.Backward-rightward [%]	67.979	79.79	11.811	22.95	0.00276867	0.823029	0.174202	0/82/17	ML disp. [mm]													ML disp. [mm]
		Success.Backward [%]	78.3083	82.97	4.66171	18.51	0.00978782	0.914235	0.0759777	1/91/8
		Success.Backward-leftward [%]	92.5197	84.6859	-7.83382	27.69	0.0845978	0.906918	0.00848404	8/91/1
		Success.Leftward [%]	74.1463	60.928	-13.2184	14.37	0.43807	0.561603	0.000327867	44/56/0
		Success.Forward-leftward [%]	77.6915	70.8102	-6.88124	16.51	0.13063	0.86488	0.00449026	13/86/0											LIMITS OF STABILITY
														COP mean speed [mm/s]
		RSEO: Rigid Surface Eyes Open												RMS [mm]
		RSEC: Rigid Surface Eyes Closed												Area[cm2]
		SSEO: Soft Surface Eyes Open												AP disp. [mm]
		SSEC: Soft Surface Eyes Closed												ML disp. [mm]
														Lim.COP.Forward [mm]
		LDE: Limits Of Stability												Lim.COP.Forward-rightward [mm]
														Lim.COP.Rightward [mm]
														Lim.COP.Backward-rightward [mm]
														Lim.COP.Backward [mm]
														Lim.COP.Backward-leftward [mm]
														Lim.COP.Leftward [mm]
														Lim.COP.Forward-leftward [mm]
														Success.Forward [%]
														Success.Forward-rightward [%]
														Success.Rightward [%]
														Success.Backward-rightward [%]
														Success.Backward [%]
														Success.Backward-leftward [%]
														Success.Leftward [%]
														Success.Forward-leftward [%]
